# Supplementary material for: A Prospective Comparative Study of Health Inequalities and the Epidemiology of Stroke in French Guiana and Dijon, France
Source: Front Public Health. 2022 May 13;10:849036. doi: 10.3389/fpubh.2022.849036 (PMC9136220; doi:10.3389/fpubh.2022.849036)
Supplement: Supplementary file 1 [file Table_1.xlsx]

## Sheet: Feuil1
	Dijon		French Guiana		p
	N(418)	%	N(234)	%
Socio-demographic characteristics
Age					<0.0001
Mean (SD)	69.3 (15.7)		62.8 (13.8)
Min-Max	20-96		22-94
Age (classes)					<0.0001
< 50	60	14.3	43	18.4
[50-65[	94	22.5	86	36.7
[65-80[	134	32.1	77	32.9
≥80	130	31.1	28	12.0
Age (2 categories)					<0.0001
< 65 years	154	36.8	129	55.1
≥ 65 years	264	63.2	105	44.9
Gender					0.0295
Male	224	53.6	146	62.4
Female	194	46.4	88	37.6
Sub-Saharan ethnicity					<0.0001
No	416	99.5	141	60.3
Yes	2	0.5	93	39.7
European ethnicity					<0.0001
No	23	5.5	136	58.1
Yes	395	94.5	98	41.9
Precariousness					<0.0001
No	252	60.6	73	32.3
Yes	164	39.4	153	67.7
Education level					0.016
Baccalaureate or more
No	319	77.0	184	85.2
Yes	95	23.0	32	14.8
Health care use
Distance to nearest GP < 15 minutes					0.0001
No	54	13.0	76	33.3
Yes	363	87.0	152	66.7
Hospital distance					<0.0001
<15 minutes	140	33.6	108	47.0
15 to 30 minutes	222	53.2	77	33.5
30 minutes and more	55	13.2	45	19.6
Health insurance					<0.0001
No	4	1.0	36	15.6
Yes	414	99.0	194	84.3
CMU (among health insurance beneficiaries)					<0.0001
No	406	98.1	109	59.6
Yes	8	1.9	74	40.4
Supplementary health insurance					<0.0001
No	17	4.1	83	36.9
Yes	401	95.9	142	63.1
Welfare pensions and insurance					<0.0001
No	393	95.4	91	44.0
Yes	19	4.6	116	56.0
Number of visits to a general practitioner in the last 12 months					<0.0001
0	31	7.5	52	22.9
1-2	64	15.4	68	30.0
2-3	182	43.9	68	30.0
4-5	54	13.0	16	7.0
8 and more	84	20.2	23	10.1
Number of visits to a dentist in the last 12 months					<0.0001
0	249	60.4	186	81.9
1	97	23.5	26	11.4
2and more	66	16.0	15	6.6
Number of visits to a specialist in the last 12 months					<0.0001
0	154	37.2	176	76.9
1	89	21.5	25	10.9
2and more	171	41.3	28	12.2
Hospitalization in the year prior to the stroke					0.595
No	321	77.3	175	79.2
Yes	94	22.7	46	20.8
